# Supplementary material for: NFATc3 mediates the sensitivity of gastric cancer cells to arsenic sulfide
Source: PubMed Central journal article supplement (PMC5581065; doi:10.18632/oncotarget.17175), 2017-04-18
Supplement: oncotarget-08-52735-s001.pdf [file oncotarget-08-52735-s001.pdf]

## NFATc3 mediates the sensitivity of gastric cancer cells to arsenic sulfide

### SUPPLEMENTARY FIGURE

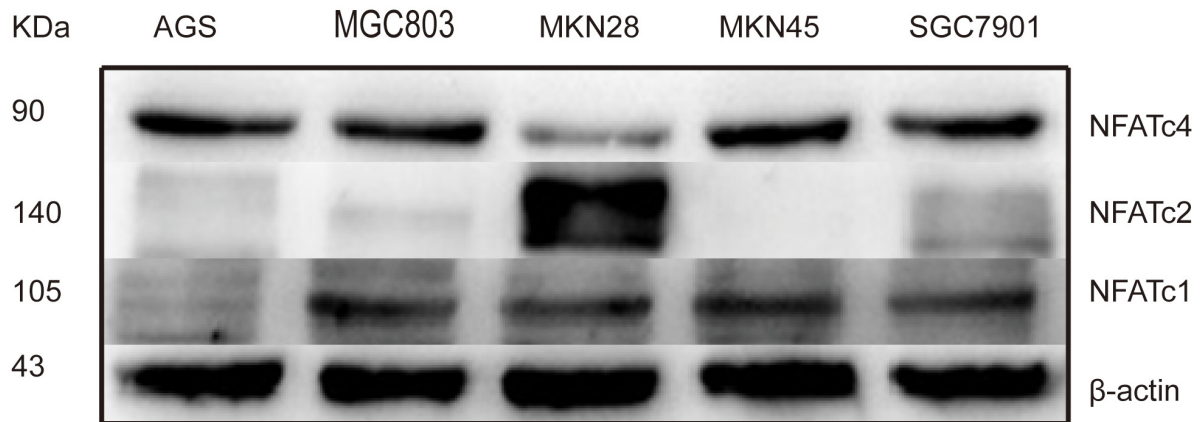

Supplementary Figure 1: The baseline expression of other members of NFAT family including NFATc1, NFATc2 and NFATc14 in AGS, MGC803, MKN28, MKN45 and SGC7901.
